# Supplementary material for: Tuning the crosslinking and degradation of hyaluronic acid/gelatin hydrogels using hydrogen peroxide for muscle cell sheet fabrication
Source: Royal Society of Chemistry journal article supplement (doi:10.1039/d3sm00560g), 2023-01-01
Supplement: d3sm00560g1.pdf [file d3sm00560g1.pdf]

## Electronic Supplementary Information (ESI)

# Tuning the crosslinking and degradation of hyaluronic acid/gelatin hydrogels using hydrogen peroxide for muscle cell sheet fabrication

*Kelum Chamara Manoj Lakmal Elvitigala,<sup>a</sup> Wildan Mubarok<sup>a</sup> and Shinji Sakai\*,<sup>a</sup>*

<sup>a</sup>Department of Materials Engineering Science, Graduate School of Engineering Science, Osaka  
University, Toyonaka, Osaka, 560-8531, Japan.

\* Corresponding author: [sakai@cheng.es.osaka-u.ac.jp](mailto:sakai@cheng.es.osaka-u.ac.jp)

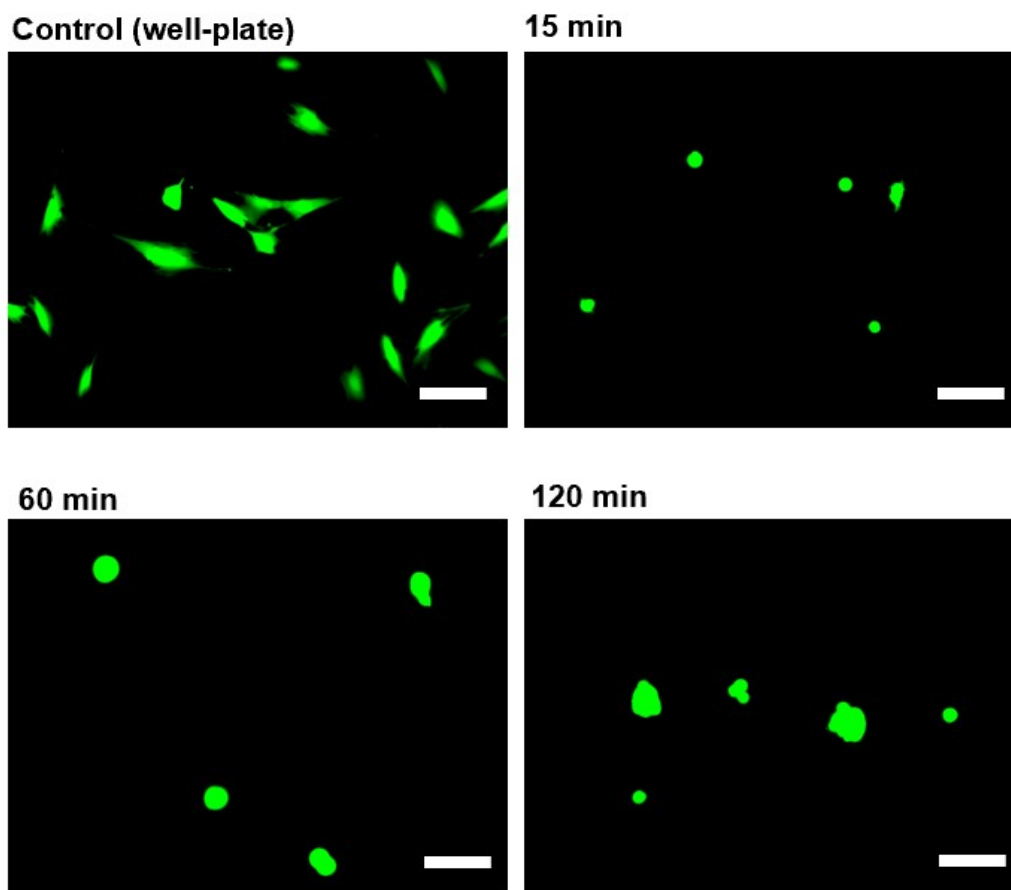

**Fig. S1.** Fluorescence micrographs of C2C12 cell after 2 days of culture on HA-Ph hydrogel obtained through exposing air containing  $\text{H}_2\text{O}_2$  for PBS containing 2 w/v% HA-Ph and 1 U/mL HRP for 15-120 min. Bars: 100  $\mu\text{m}$ .

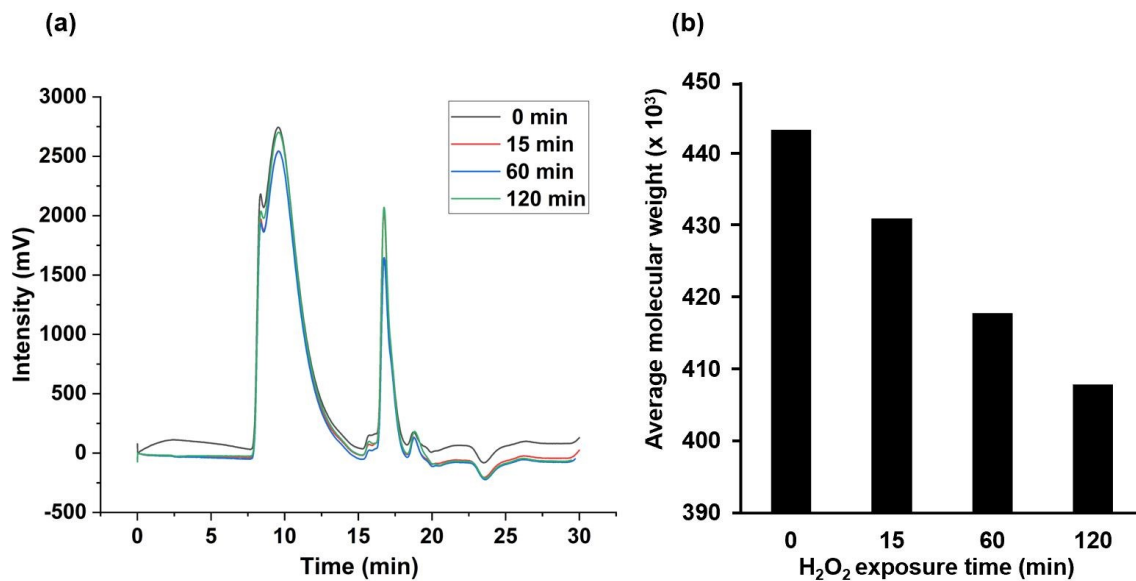

**Fig. S2.** (a) Intensity time curve and (b) The average molecular weight of HA-Ph after exposure to 16 ppm H<sub>2</sub>O<sub>2</sub> supplied from the air for 0 – 120 min. The average molecular weight was calculated relative to the pullulan standards. HPLC conditions: separation was conducted on a SHIMADZU HPLC (LC-20AD, Shimadzu, Kyoto, Japan) system equipped with Shodex OHpak SB805 HQ, 8 mmID x 300 mmL column; mobile phase PBS at pH 7.4; flowrate 0.7 mL/min; temperature, 25 °C.
